# Supplementary material for: Effects of acupuncture on age-related macular degeneration: A systematic review and meta-analysis of randomized controlled trials
Source: PubMed Central journal article supplement (PMC10035922; doi:10.1371/journal.pone.0283375), 2023-03-23
Supplement: pone.0283375.s002.pdf [file pone.0283375.s002.pdf]

## Supplement 1 Search strategy

**Table 1 Search strategy**

| No | Database<br>(Number of articles<br>retrieved) | Search items                                                                                                                                                                                                                                                                                                                                                                                                                                                                                                                                                                                                                                                                                                                                                                                                                                                                                                                                                                                                                                                                                                                                  |
|----|-----------------------------------------------|-----------------------------------------------------------------------------------------------------------------------------------------------------------------------------------------------------------------------------------------------------------------------------------------------------------------------------------------------------------------------------------------------------------------------------------------------------------------------------------------------------------------------------------------------------------------------------------------------------------------------------------------------------------------------------------------------------------------------------------------------------------------------------------------------------------------------------------------------------------------------------------------------------------------------------------------------------------------------------------------------------------------------------------------------------------------------------------------------------------------------------------------------|
| 1  | PUBMED<br>(n = 3)                             | <p>1. ("Randomized Controlled Trial" [Publication Type]) OR ("Randomized Trial" [All Fields]).</p> <p>2. ("acupuncture"). [MeSH Terms]</p> <p>3. ("exp acupuncture therapy" OR "acupuncture" OR "acupressure" OR "acupoint" OR "electroacupuncture" OR "electro-acupuncture" OR "elongated needle" OR "warming needle" OR "auricular acupuncture" ). [All Fields]</p> <p>4. or/2,3.</p> <p>5.(Age-Related Macular Degeneration[MeSH Terms])</p> <p>6.("Degeneration, Macular" OR "Macular Degenerations" OR "Maculopathy" OR "Maculopathies" OR "Macular Dystrophy" OR "Dystrophy, Macular" OR "Macular Dystrophies" OR "Age-Related Macular Degeneration" OR "Age Related Macular Degeneration" OR "Age-Related Macular Degenerations" OR "Macular Degeneration, Age-Related" OR "Macular Degeneration, Age Related" OR "Maculopathies, Age-Related" OR "Maculopathy, Age-Related" OR "Maculopathy, Age Related" OR "Age-Related Maculopathies" OR "Age Related Maculopathies" OR "Age-Related Maculopathy" OR "Age Related Maculopathy"). [All Fields]</p> <p>7. or/5,6.</p> <p>8."humans". [MeSH Terms]</p> <p>9. 1 and 4 and 7 and 8.</p> |
| 2  | Cochrane<br>(n = 4)                           | <p>("Acupuncture") AND ("Randomized Trial") AND ("Randomized Controlled Trial") AND ("Age-Related Macular Degeneration" OR "Degeneration, Macular" OR "Macular Degenerations" OR "Maculopathy" OR "Maculopathies" OR "Macular Dystrophy" OR "Dystrophy, Macular" OR "Macular Dystrophies" OR "Age-Related Macular Degeneration" OR "Age Related Macular Degeneration" OR "Age-Related Macular Degenerations" OR "Macular Degeneration, Age-Related" OR "Macular Degeneration, Age Related" OR "Maculopathies, Age-Related" OR "Maculopathy, Age-Related" OR "Maculopathy, Age Related" OR "Age-Related Maculopathies" OR "Age Related Maculopathies" OR "Age-Related Maculopathy" OR "Age Related Maculopathy")</p>                                                                                                                                                                                                                                                                                                                                                                                                                           |

|   |                                                     |                                                                                                                                                                                                                                                                                                                                                                                                                                                                                                                                                                                                                                                                                                                                                                                                                                                                                                                                                                                                                                                         |
|---|-----------------------------------------------------|---------------------------------------------------------------------------------------------------------------------------------------------------------------------------------------------------------------------------------------------------------------------------------------------------------------------------------------------------------------------------------------------------------------------------------------------------------------------------------------------------------------------------------------------------------------------------------------------------------------------------------------------------------------------------------------------------------------------------------------------------------------------------------------------------------------------------------------------------------------------------------------------------------------------------------------------------------------------------------------------------------------------------------------------------------|
| 3 | MEDLINE<br>(n = 2)                                  | <ol style="list-style-type: none"> <li>1. randomized controlled trial.pt.</li> <li>2. controlled clinical trial.pt.</li> <li>3. randomized.ab.</li> <li>4. randomly.ab.</li> <li>5. placebo.ab.</li> <li>6. trial.ab.</li> <li>7. groups.ab.</li> <li>8. or/1-7.</li> <li>9. exp animals/ not humans. sh.</li> <li>10. 8 not 9.</li> <li>11. ("acupuncture").ab.</li> <li>12. ("Age-Related Macular Degeneration" OR "Degeneration, Macular" OR "Macular Degenerations" OR "Maculopathy" OR "Maculopathies" OR "Macular Dystrophy" OR "Dystrophy, Macular" OR "Macular Dystrophies" OR "Age-Related Macular Degeneration" OR "Age Related Macular Degeneration" OR "Age-Related Macular Degenerations" OR "Macular Degeneration, Age-Related" OR "Macular Degeneration, Age Related" OR "Maculopathies, Age-Related" OR "Maculopathy, Age-Related" OR "Maculopathy, Age Related" OR "Age-Related Maculopathies" OR "Age Related Maculopathies" OR "Age-Related Maculopathy" OR "Age Related Maculopathy").ab.</li> <li>13. 10 and 11 and 12.</li> </ol> |
| 4 | Embase<br>(n =8)                                    | (Age-Related Macular Degeneration, acupuncture, randomized controlled trial, randomized) using a combination of multi-fieldsearch in all fields and Emtree                                                                                                                                                                                                                                                                                                                                                                                                                                                                                                                                                                                                                                                                                                                                                                                                                                                                                              |
| 5 | China National Knowledge Infrastructure<br>(n = 58) | ("Acupuncture" OR "electroacupuncture" OR "warm needle") [MESH] AND ("Age-Related Macular Degeneration" OR "Macular Degenerations") [MESH]                                                                                                                                                                                                                                                                                                                                                                                                                                                                                                                                                                                                                                                                                                                                                                                                                                                                                                              |
| 6 | SINOMED<br>(n = 66)                                 | <ol style="list-style-type: none"> <li>1.("Acupuncture" OR "electroacupuncture" OR "warm needle"). [Common field]</li> <li>2. ("Age-Related Macular Degeneration" OR "Macular Degenerations"). [Common field]</li> </ol>                                                                                                                                                                                                                                                                                                                                                                                                                                                                                                                                                                                                                                                                                                                                                                                                                                |

|                                              |                                                        |                                                                                                                                                                                                                                                                                                                                                                                                                                                                                                                                                                                                                                                                                                                                                                                                                                                                                                                                                                                                                                                         |
|----------------------------------------------|--------------------------------------------------------|---------------------------------------------------------------------------------------------------------------------------------------------------------------------------------------------------------------------------------------------------------------------------------------------------------------------------------------------------------------------------------------------------------------------------------------------------------------------------------------------------------------------------------------------------------------------------------------------------------------------------------------------------------------------------------------------------------------------------------------------------------------------------------------------------------------------------------------------------------------------------------------------------------------------------------------------------------------------------------------------------------------------------------------------------------|
|                                              |                                                        | 3. 1 and 2.                                                                                                                                                                                                                                                                                                                                                                                                                                                                                                                                                                                                                                                                                                                                                                                                                                                                                                                                                                                                                                             |
| 7                                            | Wanfang<br>(n = 54)                                    | 1.("Acupuncture" OR "electroacupuncture" OR "warm needle"). [Common field]<br>2. ("Age-Related Macular Degeneration" OR "Macular Degenerations"). [Common field]<br>3. 1 and 2.                                                                                                                                                                                                                                                                                                                                                                                                                                                                                                                                                                                                                                                                                                                                                                                                                                                                         |
| 8                                            | Technology<br>Periodical Database<br>(VIP)<br>(n = 30) | 1.("Acupuncture" OR "electroacupuncture" OR "warm needle"). [MESH or keywords]<br>2.("Age-Related Macular Degeneration" OR "Macular Degenerations"). [MESH or keywords]<br>3.1 and 2.                                                                                                                                                                                                                                                                                                                                                                                                                                                                                                                                                                                                                                                                                                                                                                                                                                                                   |
| 9                                            | www.clinicaltrials.gov<br>(n = 1)                      | ("Acupuncture" AND "Age-Related Macular Degeneration" ) AND ( "randomized controlled trial" OR"randomized trial")                                                                                                                                                                                                                                                                                                                                                                                                                                                                                                                                                                                                                                                                                                                                                                                                                                                                                                                                       |
| 10                                           | www.clinicaltrialsregister.eu<br>(n = 0)               | ("Acupuncture" AND "Age-Related Macular Degeneration" ) AND ( "randomized controlled trial" OR"randomized trial")                                                                                                                                                                                                                                                                                                                                                                                                                                                                                                                                                                                                                                                                                                                                                                                                                                                                                                                                       |
| 11                                           | trialssearch.who.int<br>(n = 0)                        | ("Acupuncture" AND "Age-Related Macular Degeneration" ) AND ( "randomized controlled trial" OR"randomized trial")                                                                                                                                                                                                                                                                                                                                                                                                                                                                                                                                                                                                                                                                                                                                                                                                                                                                                                                                       |
| Mainly excluded literature<br>(with reasons) |                                                        | [1] Zhu JL, Gu ZY, Liu YL, et al. Clinical observation of acupuncture in the treatment of dry macular degeneration [J]. Shanghai Journal of Acupuncture and Moxibustion, 2018;37(06): 630-634. (comparison of different acupoints)<br>[2] Li G, Shao Y, Yin J. Early age-related macular degeneration treated with emayaoling acupuncture technique: a randomized controlled trial. Zhongguo Zhen Jiu. 2017;37(12):1294-1298. (comparison of different acupuncture techniques)<br>[3] Zhang X, Wang WY. Clinical study of Huatan Sanyu Mingmu Decoction combined with acupuncture in the treatment of exudative age-related macular degeneration [J]. Electronic Journal of Clinical Medical Literature, 2020;7(44):157+160. (inappropriate comparison)<br>[4] Zhu HY, Zou JS. Analysis on therapeutic effect of Professor Zou Jusheng’ s emolliating liver and fortifying spleen method combined with acupuncture treating age-related macular degeneration[J].China Journal of Chinese Ophthalmology, 2015;25(04):265-268. (inappropriate comparison) |

[5] Lu AH. Clinical study of Huangbanfuming decoction combined with acupuncture in the treatment of age-related macular degeneration [D]. Hebei Medical University, 2016. (inappropriate comparison)

[6] Li T. Efficacy of Huangban Fuming Decoction combined with acupuncture in the treatment of age-related macular degeneration and its effects on macular edema, subjective symptoms, serum VEGF, PDGF and ES levels [J]. Journal of Sichuan of Traditional Chinese Medicine, 2018;36(12):174-177. (inappropriate comparison)

**Supplement 2 Evaluation criteria of curative effect based on the “Criteria of Diagnosis and Therapeutic Effect of Internal Diseases and Syndromes in Traditional Chinese Medicine”**

**File 1 Evaluation criteria**

- 1) Valid, with at least one of the following manifestations: visual acuity improved by 1 line or more; improvement of macular lesions in the fundus (exudation, partial absorption of hemorrhage); improved visual field;
- 2) Invalid: no change or progressive decrease in visual acuity; no change or aggravation of macular exudation and hemorrhage; no change or aggravation of visual field.

## Supplement 3 Summary of findings

**Table 2 Grading of evidence**

| Outcomes                       | Risk of bias         | Inconsistency             | Indirectness | Imprecision                | Other considerations | Certainty of the evidence |
|--------------------------------|----------------------|---------------------------|--------------|----------------------------|----------------------|---------------------------|
| <b>Clinical efficacy rates</b> | Serious <sup>a</sup> | Not serious               | Not serious  | Serious <sup>b</sup>       | None                 | ⊕⊕○○<br>LOW               |
| Acupuncture alone              | Serious <sup>a</sup> | Not serious               | Not serious  | Serious <sup>bc</sup>      | None                 | ⊕○○○<br>VERY LOW          |
| Acupuncture as an adjunct      | Serious <sup>a</sup> | Not serious               | Not serious  | Serious <sup>bc</sup>      | None                 | ⊕○○○<br>VERY LOW          |
| <b>BCVA</b>                    | Serious <sup>a</sup> | Very serious <sup>d</sup> | Not serious  | Very serious <sup>bc</sup> | None                 | ⊕○○○<br>VERY LOW          |
| <b>CMT</b>                     | Serious <sup>a</sup> | Serious <sup>f</sup>      | Not serious  | Very serious <sup>bc</sup> | None                 | ⊕○○○<br>VERY LOW          |

### GRADE Working Group grades of evidence

**High certainty:** We are very confident that the true effect lies close to that of the estimate of the effect

**Moderate certainty:** We are moderately confident in the effect estimate: The true effect is likely to be close to the estimate of the effect, but there is a possibility that it is substantially different

**Low certainty:** Our confidence in the effect estimate is limited: The true effect may be substantially different from the estimate of the effect

**Very low certainty:** We have very little confidence in the effect estimate: The true effect is likely to be substantially different from the estimate of effect

### Explanations

- a. Concerns about bias in the domains of allocation concealment, blinding of outcome assessment and selective reporting.
- b. Small sample studies accounted for the majority.
- c. Concerned about the number of studies and participants.

d. I-squared= 89%.

e. Wide confidence intervals around estimate.

f. I-squared= 67%
